# Supplementary material for: Synonymous Codon Usage Analysis of Three Narcissus Potyviruses
Source: MDPI journal article supplement (doi:10.3390/v14050846), 2022-04-19
Supplement: s1 [file s1]

Supplementary Materials

# Synonymous Codon Usage Analysis of Three Narcissus Potyviruses

**Table S1.** The three potyviruses detected in this study. The 26 CP gene sequences of the three narcissus viruses were sequenced by ourselves.

| Virus | Isolate  | Accession Number | Time |
|-------|----------|------------------|------|
| NDV   | NDV-1    | MH182727         | 2018 |
| NDV   | NDV-3    | MH182728         | 2018 |
| NDV   | NDV-4    | MH182729         | 2018 |
| NDV   | NDV-6    | MH182730         | 2018 |
| NDV   | NDV-7    | MH182731         | 2018 |
| NDV   | NDV-8    | MH182732         | 2018 |
| NDV   | NDV-11   | MH182733         | 2018 |
| NDV   | NDV-12   | MH182734         | 2018 |
| NDV   | NDV-14   | MH182735         | 2018 |
| NDV   | NDV-15   | MH182736         | 2018 |
| NDV   | NDV-17   | MH182737         | 2018 |
| NDV   | NDV-22   | MH182738         | 2018 |
| NDV   | NDV-23   | MH182739         | 2018 |
| NDV   | NDV-25   | MH182740         | 2018 |
| NDV   | NDV-26   | MH182741         | 2018 |
| NDV   | NDV-27   | MH182742         | 2018 |
| NLSYV | NLSYV-9  | MH182718         | 2018 |
| NLSYV | NLSYV-10 | MH182719         | 2018 |
| NLSYV | NLSYV-13 | MH182720         | 2018 |
| NLSYV | NLSYV-14 | MH182721         | 2018 |
| NLSYV | NLSYV-16 | MH182722         | 2018 |
| NLSYV | NLSYV-18 | MH182723         | 2018 |
| NYSV  | NYSV-3   | MH182715         | 2018 |
| NYSV  | NYSV-5   | MH182716         | 2018 |
| NYSV  | NYSV-10  | MH182717         | 2018 |
| NYSV  | NYSV-11  | MH182709         | 2018 |

NDV, Narcissus degeneration virus; NLSYV, Narcissus late season yellows virus; NYSV, Narcissus yellow stripe virus.

**Table S2.** Recombination sites detected in the protein encoding regions of Narcissus yellow stripe virus.

| Isolate  | Major parent    | Minor parent | Recombination site | Recombination detecting program ( <i>p</i> -value <sup>a</sup> ) |                         |                         |                         |                        |                         |                         |
|----------|-----------------|--------------|--------------------|------------------------------------------------------------------|-------------------------|-------------------------|-------------------------|------------------------|-------------------------|-------------------------|
|          |                 |              |                    | RDP                                                              | GENE-CONV               | BOOTSCHAN               | MAXCHI                  | CHI-MAERA              | SISCAN                  | 3SEQ                    |
| JQ686724 | UN <sup>b</sup> | MH182709     | 402-813            | 2.776×10 <sup>-7</sup>                                           | 7.052×10 <sup>-18</sup> | 1.426×10 <sup>-13</sup> | 7.265×10 <sup>-17</sup> | 2.575×10 <sup>-7</sup> | 3.445×10 <sup>-12</sup> | 2.308×10 <sup>-36</sup> |
| KM066972 | MH182709        | LC314396     | 419-798            | 1.066×10 <sup>-10</sup>                                          | 5.050×10 <sup>-3</sup>  | 8.415×10 <sup>-11</sup> | 7.798×10 <sup>-44</sup> | 2.239×10 <sup>-9</sup> | 1.295×10 <sup>-4</sup>  | 4.458×10 <sup>-11</sup> |
| KU516386 | MH182709        | LC314396     | 419-783            | 1.066×10 <sup>-10</sup>                                          | 5.050×10 <sup>-3</sup>  | 8.415×10 <sup>-11</sup> | 7.798×10 <sup>-44</sup> | 2.239×10 <sup>-9</sup> | 1.295×10 <sup>-4</sup>  | 4.458×10 <sup>-11</sup> |

---

<sup>a</sup>The analyses were done using default settings and a Bonferroni-corrected  $p$ -values cut-off of 0.01 in RDP4 software; <sup>b</sup>UN, Unknown
